# Supplementary material for: Simultaneous nutrient removal and reduction in sludge from sewage waste using an alternating anaerobic–anoxic–microaerobic–aerobic system combining ozone/ultrasound technology
Source: Royal Society of Chemistry journal article supplement (doi:10.1039/c4ra05762g), 2014-08-29
Supplement: c4ra05762g1.pdf [file c4ra05762g1.pdf]

## Electronic supplementary information

### 1. DNA extraction

After reaching stable operation, sludge samples taken from AAMA<sub>1#</sub> and AAMA<sub>2#</sub> were collected for DNA extraction. Before DNA extraction, 1-ml combined sludge samples were centrifuged at 8000g to remove supernatant, corresponding to 0.25 g pellet was collected for use. In this study, total genomic DNA was extracted using a Power-Soil DNA Isolation Kit (Mo Bio Laboratories, Carlsbad, CA) according to the manufacturer's instructions. For examining the quantity and quality of the extracted DNA of the sludge samples, a Beckman DU800 spectrophotometer was applied by set its absorbance at 260 and 280 nm.

### 2. High-throughput pyrosequencing of 16S rRNA gene

The V1-V3 region of the bacteria 16S ribosomal RNA gene were amplified by polymerase chain reaction (95 °C for 2 min, followed by 25 cycles at 95 °C for 30 s, 55 °C for 30 s, and 72 °C for 30 s and a final extension at 72 °C for 5 min) by using primers 27F 5'-(CGTATCGCCTCCCTCGCGCCATCAG-3' 5'-AGAGTTTGATCCTGGCTCAG)-3' and 533R 5'-(CTATGCGCCTTGCCAGCCCGCTCAG-3' -MID tags-5'-ATTACCGCGGCTGCTGGCA)-3'. PCR reactions were performed in a 20 µL mixture containing 4 µL of 5 × FastPfu Buffer, 2 µL of 2.5 mM dNTPs, 0.8 µL of each primer (5 µM), 0.4 µL of FastPfu Polymerase, and 10 ng of template DNA.

### 3. 454 pyrosequencing and processing of pyrosequencing data

After purification using the AxyPrep DNA Gel Extraction Kit (Axygen Biosciences, Union City, CA, U.S.) and quantification using QuantiFluor™ -ST (Promega, U.S.), a mixture of amplicons was used for pyrosequencing on a Roche 454 GS FLX+ Titanium platform (Roche 454 Life Sciences, Branford, CT, U.S.) according to standard protocols.

Pyrosequencing produced 10267 (AAMA<sub>1#</sub>-sample) and 10006 (AAMA<sub>2#</sub>-sample) high-quality V1-V3 tags of the 16S rRNA gene with an average length of 455 bp. The resulting sequences were processed using QIIME (version 1.17). After removing sequences with average quality score <20 over a 50 bp sliding window and sequences shorter than 200bp, with homopolymers longer than six nucleotides, and containing ambiguous base calls or incorrect primer sequences, a total of 10267 (AAMA<sub>1#</sub>-sample) and 10006 (AAMA<sub>2#</sub>-sample) high-quality sequences were produced with an average length of 455 bp per sequence. Operational Taxonomic Units (OTUs) were clustered with 97% similarity cutoff using UPARSE (version 7.1 <http://drive5.com/uparse/>) and chimeric sequences were identified and removed using UCHIME. The phylogenetic affiliation of each 16S rRNA gene sequence was analyzed by RDP Classifier (<http://rdp.cme.msu.edu/>) against the silva (SSU115)16S rRNA database using confidence threshold of 70%.<sup>2</sup>

### 4. Biodiversity analysis and phylogenetic classification

The obtained sequences were clustered into operational taxonomic units (OTUs) by setting a 0.03 distance level (97% similarity) or 0.05 distance limit (95% similarity) using the MOTHUR program. In this study, the sequences were phylogenetically allocated down to the phylum, class and genus levels using the MOTHUR program ([http://www.mothur.org/wiki/Main\\_Page](http://www.mothur.org/wiki/Main_Page)). For a given phylogenetic group, the relative abundance was set as the number of sequences affiliated with that group which is divided by the total number of sequences.<sup>3</sup> As shown in Figs. 2, 3, 4, phyla, class, and genus with relative abundance lower than 0.5 % were defined as "Others".

## References

- 1 L. Lu, D. F. Xing, B. F. Liu, N. Q. Ren, *Water Res.*, 2012, **46**, 1015-1026.

- 2 K. R. Amato, C. J. Yeoman, A. Kent, N. Righini, F. Carbonero, A. Estrada, H. R. Gaskins, R. M. Stumpf, S. Yildirim, M. Torralba, M. Gillis, B. A. Wilson, K. E. Nelson, B. A. White, S. R. Leigh, *The ISME Journal*, 2013, **7**,1344-1353.
- 3 J. N. Jia, Y. Tang, B. F. Liu, D. Wu, N. Q. Ren, D. F. Xing, *Bioresource Technol.*, 2013, **144**, 94-99.
